# Supplementary material for: Markers of Oxidative Damage Are Not Elevated in Otherwise Healthy Individuals With the Metabolic Syndrome
Source: PubMed Central journal article supplement — Diabetes Care. 2010 Feb 25;33(5):1140–2. doi: 10.2337/dc09-2124 (PMC2858191; doi:10.2337/dc09-2124), 2010-02-25
Supplement: supp_dc09-2124_onlineappendix.pdf [file supp_dc09-2124_onlineappendix.pdf]

## Markers Of Oxidative Damage Are Not Elevated In Otherwise Healthy Individuals With The Metabolic Syndrome

<sup>1,2</sup>Raymond CS Seet, MD; <sup>1</sup>Chung-Yung J Lee, PhD; <sup>1,2</sup>Erle CH Lim, MD; <sup>2</sup>Amy ML Quek, MD; <sup>3</sup>Shan-Hong Huang, MSc; <sup>1,2</sup>Chin-Meng Khoo, <sup>3</sup>Barry Halliwell, DSc

<sup>1</sup>Department of Medicine, Yong Loo Lin School of Medicine, National University of Singapore

<sup>2</sup>Department of Medicine, National University Hospital, Singapore

<sup>3</sup>Department of Biochemistry, Yong Loo Lin School of Medicine, National University of Singapore

### ONLINE APPENDIX

**Supplemental Table 1.** Clinical characteristics, risk components of metabolic syndrome and markers of oxidative damage

|                                   | Male<br>(n=87)    | Female<br>(n=92)  | P-values |
|-----------------------------------|-------------------|-------------------|----------|
| Age (years)                       | 42.8 (13.7)       | 43.9 (13.7)       | 0.558    |
| Race, Chinese (%)                 | 70 (81%)          | 72 (78%)          | 0.610    |
| Systolic blood pressure (mmHg)    | 130 (15)          | 122 (14)          | 0.011    |
| Diastolic blood pressure (mmHg)   | 80 (12)           | 78 (9)            | 0.374    |
| Body mass index                   | 24.2 (3.5)        | 23.1 (4.1)        | 0.030    |
| High-density lipoprotein (mmol/l) | 1.29 (0.38)       | 1.61 (0.44)       | <0.001   |
| Triglyceride (mmol/l)             | 1.27 (0.65)       | 1.05 (0.73)       | 0.036    |
| Glucose (mmol/l)                  | 5.13 (1.25)       | 4.75 (1.02)       | 0.028    |
| Insulin (pmol/l)                  | 8.40 (5.70-16.20) | 7.10 (5.20-12.80) | 0.932    |
| HOMA-IR                           | 1.72 (1.14-3.55)  | 1.47 (1.04-2.68)  | 0.653    |
| Risk factor components of MetS    |                   |                   |          |
| None                              | 41 (47%)          | 58 (63%)          | 0.048    |
| 1-2                               | 39 (45%)          | 27 (29%)          | 0.010    |
| 3 and more                        | 7 (8%)            | 7 (8%)            | 0.805    |

Data were expressed as absolute numbers (percentage), mean (standard deviation) or median (inter-quartile range) Abbreviations: HOMA-IR=homeostatic model assessment-insulin resistance index, MetS=metabolic syndrome

**Supplemental Table 2.** Comparison between risk factors components of the metabolic syndrome in relation to markers of oxidative damage, high-sensitivity C-reactive protein and enzymatic activities in males

|                                             | Number of Risk Factor Components of the Metabolic Syndrome |                     |                          | P-trend |
|---------------------------------------------|------------------------------------------------------------|---------------------|--------------------------|---------|
|                                             | None (n=41)                                                | One or Two (n=39)   | Metabolic syndrome (n=7) |         |
| Age (years)                                 | 40.05 (14.03)                                              | 45.69 (13.37)       | 42.86 (8.57)             | 0.254   |
| Race, Chinese (%)                           | 32 (78%)                                                   | 29 (74%)            | 5 (71%)                  | 0.858   |
| Insulin (pmol/l)                            | 9.07 (6.49)                                                | 11.79 (6.97)        | 29.26 (28.36)            | 0.001   |
| HOMA-IR                                     | 1.94 (1.42)                                                | 2.74 (1.83)         | 4.69 (2.00)              | 0.001   |
| <b>Blood markers</b>                        |                                                            |                     |                          |         |
| Arachidonate (AA) (ug/ml)                   | 95.74 (26.63)                                              | 87.25 (16.86)       | 81.79 (19.01)            | 0.080   |
| <b>F<sub>2</sub>-IsoPs</b>                  |                                                            |                     |                          |         |
| Esterified (ng/ml)                          | 0.30 (0.09)                                                | 0.31 (0.13)         | 0.24 (0.97)              | 0.474   |
| Free (ng/ml)                                | 0.06 (0.02)                                                | 0.06 (0.02)         | 0.07 (0.02)              | 0.155   |
| Esterified/AA (ng/ug)                       | 3.33 (1.30)                                                | 3.64 (1.63)         | 3.02 (1.48)              | 0.872   |
| <b>HETEs</b>                                |                                                            |                     |                          |         |
| Esterified (ng/ml)                          | 22.42 (8.88)                                               | 23.72 (9.43)        | 18.60 (4.99)             | 0.711   |
| Free (ng/ml)                                | 2.18 (0.95)                                                | 2.33 (1.63)         | 2.48 (0.55)              | 0.493   |
| Esterified/AA (ng/ug)                       | 0.25 (0.13)                                                | 0.28 (0.11)         | 0.24 (0.09)              | 0.646   |
| Cholesterol (mg/ml)                         | 5.08 (0.84)                                                | 5.45 (1.06)         | 5.10 (0.85)              | 0.326   |
| <b>COPs (ng/ml)</b>                         |                                                            |                     |                          |         |
| 7 $\alpha$ -OH cholesterol                  | 20.56 (7.11)                                               | 28.41 (18.81)       | 25.01 (26.45)            | 0.069   |
| 7 $\beta$ -OH cholesterol                   | 4.38 (1.65)                                                | 4.41 (1.85)         | 4.71 (1.61)              | 0.707   |
| 24-OH cholesterol                           | 16.97 (17.52)                                              | 15.76 (10.87)       | 17.75 (11.36)            | 0.914   |
| 27-OH cholesterol                           | 69.33 (22.00)                                              | 70.49 (28.41)       | 64.28 (22.92)            | 0.820   |
| <b>COPs/cholesterol (ng/mg)</b>             |                                                            |                     |                          |         |
| 7 $\alpha$ -OH cholesterol                  | 4.15 (1.63)                                                | 5.50 (3.42)         | 5.02 (5.15)              | 0.113   |
| 7 $\beta$ -OH cholesterol                   | 0.89 (0.43)                                                | 0.82 (0.35)         | 0.93 (0.32)              | 0.783   |
| 24-OH cholesterol                           | 3.43 (3.32)                                                | 3.05 (2.36)         | 3.57 (2.37)              | 0.814   |
| 27-OH cholesterol                           | 13.94 (4.70)                                               | 13.30 (5.88)        | 13.19 (6.44)             | 0.607   |
| Uric acid, uM                               | 353.51 (106.81)                                            | 382.97 (111.89)     | 364.17 (107.77)          | 0.420   |
| Allantoin, uM                               | 2.06 (0.72)                                                | 1.79 (0.69)         | 1.72 (0.75)              | 0.099   |
| GGT (U/l)                                   | 20.90 (15.00-34.65)                                        | 29.80 (20.90-49.13) | 25.90 (20.90-39.70)      | 0.130   |
| Hs-CRP (mg/l)                               | 0.72 (0.43-1.26)                                           | 1.29 (0.51-2.32) †  | 1.14 (0.92-5.49) †       | <0.001  |
| PAFAH activities (nmol/min/ml)              | 14.27 (4.48)                                               | 14.09 (4.80)        | 15.85 (2.11)             | 0.621   |
| PLA <sub>2</sub> activities (mol/min/ml)    | 7.23 (0.96)                                                | 7.42 (2.04)         | 6.59 (0.93)              | 0.714   |
| <b>Urine markers</b>                        |                                                            |                     |                          |         |
| <b>Unadjusted (ng/ml)</b>                   |                                                            |                     |                          |         |
| Total IsoPs                                 | 8.02 (6.08)                                                | 9.10 (5.51)         | 8.99 (5.67)              | 0.472   |
| 8-iso-F <sub>2</sub> -IsoPs                 | 0.79 (1.10)                                                | 0.69 (0.41)         | 0.75 (0.24)              | 0.693   |
| 2,3-dinor-F <sub>2</sub> -IsoPs             | 2.81 (1.94)                                                | 2.67 (2.14)         | 1.85 (1.46)              | 0.338   |
| 2,3-dinor-5,6-dihydro-F <sub>2</sub> -IsoPs | 4.27 (4.45)                                                | 4.27 (4.45)         | 6.39 (5.13)              | 0.103   |
| 8-OHdG                                      | 2.27 (1.35)                                                | 2.64 (1.89)         | 3.85 (2.48)              | 0.093   |
| <b>Adjusted for creatinine (ng/mg)</b>      |                                                            |                     |                          |         |
| Total IsoPs                                 | 7.53 (2.77)                                                | 7.43 (3.29)         | 6.73 (1.75)              | 0.586   |
| 8-iso-F <sub>2</sub> -IsoPs                 | 0.51 (0.28)                                                | 0.46 (0.28)         | 0.30 (0.11)              | 0.086   |
| 2,3-dinor-F <sub>2</sub> -IsoPs             | 3.34 (2.03)                                                | 3.34 (2.03)         | 2.07 (1.69)              | 0.195   |
| 2,3-dinor-5,6-dihydro-F <sub>2</sub> -IsoPs | 4.00 (2.45)                                                | 5.77 (4.41)         | 6.40 (5.13)              | 0.681   |
| 8-OHdG                                      | 0.51 (0.28)                                                | 0.46 (0.28)         | 0.30 (0.11)              | 0.086   |

Data were expressed as absolute numbers (percentage), mean (standard deviation) or median (inter-quartile range) † denotes significant difference as compared with those with no risk factor (using unpaired t-test)

Abbreviations: F<sub>2</sub>-IsoPs=F<sub>2</sub>-isoprostanes, HETEs=hydroxyeicosatetraenoic acid, COPs=cholesterol oxidation products, 8-OHdG= 8-hydroxydeoxyguanosine, PLA<sub>2</sub>=phospholipase A<sub>2</sub> activities, PAF-AH=platelet activating factor-acetylhydrolase activities, GGT=gamma glutamyltransferase, hs-CRP=high-sensitivity C-reactive protein

**Supplemental Table 3.** Comparison between risk factors components of the metabolic syndrome in relation to markers of oxidative damage, high-sensitivity C-reactive protein and enzymatic activities in females

|                                             | Number of Risk Factor Components of the Metabolic Syndrome |                     |                          | P-trend |
|---------------------------------------------|------------------------------------------------------------|---------------------|--------------------------|---------|
|                                             | None (n=58)                                                | One or Two (n=27)   | Metabolic syndrome (n=7) |         |
| Age (years)                                 | 44.29 (13.70)                                              | 42.74 (15.25)       | 46.29 (7.30)             | 0.985   |
| Race, Chinese (%)                           | 52 (90%)                                                   | 23 (85%)            | 6 (86%)                  | 0.925   |
| Insulin (pmol/l)                            | 7.31 (4.86)                                                | 17.51 (17.55) †     | 21.29 (8.81) †           | <0.001  |
| HOMA-IR                                     | 1.49 (1.13)                                                | 3.39 (3.02) †       | 4.89 (1.88) †            | <0.001  |
| <b>Blood markers</b>                        |                                                            |                     |                          |         |
| Arachidonate (AA) (ug/ml)                   | 100.92 (26.86)                                             | 94.39 (21.61)       | 91.23 (19.53)            | 0.184   |
| <b>F<sub>2</sub>-IsoPs</b>                  |                                                            |                     |                          |         |
| Esterified (ng/ml)                          | 0.33 (0.11)                                                | 0.32 (0.15)         | 0.25 (0.11)              | 0.128   |
| Free (ng/ml)                                | 0.05 (0.02)                                                | 0.05 (0.02)         | 0.06 (0.02)              | 0.939   |
| Esterified/AA (ng/ug)                       | 3.45 (1.21)                                                | 3.40 (1.46)         | 2.71 (0.99)              | 0.261   |
| <b>HETEs</b>                                |                                                            |                     |                          |         |
| Esterified (ng/ml)                          | 21.86 (7.14)                                               | 21.62 (7.54)        | 20.93 (5.81)             | 0.755   |
| Free (ng/ml)                                | 2.67 (1.44)                                                | 2.79 (1.97)         | 2.21 (1.05)              | 0.728   |
| Esterified/AA (ng/ug)                       | 0.23 (0.11)                                                | 0.24 (0.10)         | 0.24 (0.08)              | 0.813   |
| Cholesterol (mg/ml)                         | 5.41 (1.06)                                                | 5.48 (1.08)         | 4.91 (0.71)              | 0.493   |
| <b>COPs (ng/ml)</b>                         |                                                            |                     |                          |         |
| 7 $\alpha$ -OH cholesterol                  | 18.78 (6.73)                                               | 17.88 (7.84)        | 25.40 (12.80)            | 0.217   |
| 7 $\beta$ -OH cholesterol                   | 4.78 (2.78)                                                | 4.34 (2.29)         | 4.13 (1.81)              | 0.382   |
| 24-OH cholesterol                           | 14.58 (6.72)                                               | 15.01 (8.68)        | 17.47 (18.62)            | 0.475   |
| 27-OH cholesterol                           | 58.17 (2041)                                               | 56.78 (17.54)       | 48.60 (10.08)            | 0.282   |
| <b>COPs/cholesterol (ng/mg)</b>             |                                                            |                     |                          |         |
| 7 $\alpha$ -OH cholesterol                  | 3.59 (1.62)                                                | 3.37 (1.54)         | 5.12 (2.30)              | 0.198   |
| 7 $\beta$ -OH cholesterol                   | 0.89 (0.47)                                                | 0.82 (0.45)         | 0.83 (0.29)              | 0.554   |
| 24-OH cholesterol                           | 2.76 (1.29)                                                | 2.88 (1.94)         | 3.41 (3.16)              | 0.386   |
| 27-OH cholesterol                           | 11.04 (4.27)                                               | 10.71 (3.99)        | 10.01 (2.37)             | 0.520   |
| Uric acid (uM)                              | 301.55 (138.80)                                            | 310.46 (148.44)     | 435.43 (244.44)          | 0.090   |
| Allantoin (uM)                              | 1.93 (0.67)                                                | 1.72 (0.65)         | 2.01 (0.98)              | 0.619   |
| GGT (U/l)                                   | 11.35 (9.90-15.20)                                         | 13.20 (10.50-22.80) | 21.20 (15.80-24.30) †    | 0.002   |
| Hs-CRP (mg/l)                               | 0.49 (0.30-1.01)                                           | 0.80 (0.56-1.41)    | 2.93 (2.13-10.86) †      | <0.001  |
| PAFAH activities (nmol/min/ml)              | 13.24 (4.33)                                               | 14.67 (3.60)        | 11.43 (3.20)             | 0.947   |
| PLA <sub>2</sub> activities (mol/min/ml)    | 6.32 (0.97)                                                | 6.62 (0.83)         | 3.25 (0.36)              | 0.515   |
| <b>Urine markers</b>                        |                                                            |                     |                          |         |
| <b>Unadjusted (ng/ml)</b>                   |                                                            |                     |                          |         |
| Total IsoPs                                 | 15.56 (12.34)                                              | 11.08 (7.15)        | 13.36 (9.62)             | 0.184   |
| 8-iso-F <sub>2</sub> -IsoPs                 | 0.57 (0.41)                                                | 0.43 (0.34)         | 0.47 (0.21)              | 0.164   |
| 2,3-dinor-F <sub>2</sub> -IsoPs             | 3.58 (2.52)                                                | 2.83 (1.66)         | 5.15 (3.13)              | 0.663   |
| 2,3-dinor-5,6-dihydro-F <sub>2</sub> -IsoPs | 11.49 (11.94)                                              | 7.80 (6.30)         | 7.73 (1.09)              | 0.133   |
| 8-OHdG                                      | 2.16 (1.44)                                                | 1.96 (2.18)         | 2.75 (2.28)              | 0.981   |
| <b>Adjusted for creatinine (ng/mg)</b>      |                                                            |                     |                          |         |
| Total IsoPs                                 | 7.87 (3.11)                                                | 8.15 (2.94)         | 9.59 (1.54)              | 0.207   |
| 8-iso-F <sub>2</sub> -IsoPs                 | 0.59 (0.33)                                                | 0.52 (0.32)         | 0.44 (0.24)              | 0.173   |
| 2,3-dinor-F <sub>2</sub> -IsoPs             | 2.28 (1.86)                                                | 2.51 (1.82)         | 4.07 (1.70) †            | 0.043   |
| 2,3-dinor-5,6-dihydro-F <sub>2</sub> -IsoPs | 5.01 (2.49)                                                | 5.11 (2.64)         | 5.08 (2.20)              | 0.875   |
| 8-OHdG                                      | 2.08 (0.98)                                                | 1.84 (0.85)         | 2.55 (1.04)              | 0.828   |

Data were expressed as absolute numbers (percentage), mean (standard deviation) or median (inter-quartile range) † denotes significant difference as compared with those with no risk factor (using unpaired t-test)

Abbreviations: F<sub>2</sub>-IsoPs=F<sub>2</sub>-isoprostanes, HETEs=hydroxyeicosatetraenoic acid, COPs=cholesterol oxidation products, 8-OHdG= 8-hydroxydeoxyguanosine, PLA<sub>2</sub>=phospholipase A<sub>2</sub> activities, PAF-AH=platelet activating factor-acetylhydrolase activities, GGT=gamma glutamyltransferase, hs-CRP=high-sensitivity C-reactive protein

**Supplemental Table 4.** Age-adjusted correlates of Homeostasis Model Assessment Insulin Resistance (HOMA-IR) index

|                                             | Male                   |          | Female                 |          |
|---------------------------------------------|------------------------|----------|------------------------|----------|
|                                             | Regression coefficient | P-values | Regression coefficient | P-values |
| <b>Plasma markers</b>                       |                        |          |                        |          |
| F <sub>2</sub> -IsoPs                       |                        |          |                        |          |
| Esterified (ng/ml)                          | -0.083                 | 0.469    | -0.038                 | 0.728    |
| Free (ng/ml)                                | 0.121                  | 0.292    | -0.051                 | 0.638    |
| Esterified/AA (ng/ug)                       | -0.033                 | 0.775    | -0.012                 | 0.913    |
| HETEs                                       |                        |          |                        |          |
| Esterified (ng/ml)                          | -0.061                 | 0.597    | 0.408                  | 0.684    |
| Free (ng/ml)                                | -0.083                 | 0.472    | -0.130                 | 0.233    |
| Esterified/AA (ng/ug)                       | -0.049                 | 0.669    | 0.044                  | 0.689    |
| COPs (ng/ml)                                |                        |          |                        |          |
| 7 $\alpha$ -OH cholesterol                  | 0.336                  | 0.004    | 0.238                  | 0.290    |
| 7 $\beta$ -OH cholesterol                   | -0.052                 | 0.653    | 0.339                  | 0.001    |
| 24-OH cholesterol                           | 0.000                  | 0.999    | 0.181                  | 0.094    |
| 27-OH cholesterol                           | -0.104                 | 0.371    | -0.100                 | 0.358    |
| COPs/cholesterol (ng/mg)                    |                        |          |                        |          |
| 7 $\alpha$ -OH cholesterol                  | 0.359                  | 0.001    | 0.136                  | 0.211    |
| 7 $\beta$ -OH cholesterol                   | -0.024                 | 0.832    | 0.320                  | 0.003    |
| 24-OH cholesterol                           | 0.017                  | 0.887    | 0.119                  | 0.278    |
| 27-OH cholesterol                           | -0.081                 | 0.479    | -0.179                 | 0.106    |
| Uric acid (uM)                              | 0.068                  | 0.564    | 0.221                  | 0.046    |
| Allantoin (uM)                              | -0.141                 | 0.237    | -0.036                 | 0.759    |
| GGT (U/l)                                   | -0.020                 | 0.863    | 0.199                  | 0.062    |
| Hs-CRP (mg/l)                               | 0.500                  | <0.001   | 0.285                  | 0.007    |
| PAFAH activities (nmol/min/ml)              | -0.014                 | 0.903    | 0.032                  | 0.764    |
| PLA <sub>2</sub> activities (mol/min/ml)    | -0.062                 | 0.591    | 0.128                  | 0.247    |
|                                             |                        |          |                        |          |
| <b>Urine markers</b>                        |                        |          |                        |          |
| Unadjusted (ng/ml)                          |                        |          |                        |          |
| Total F <sub>2</sub> -IsoPs                 | 0.049                  | 0.674    | -0.056                 | 0.607    |
| 8-iso-F <sub>2</sub> -IsoPs                 | -0.033                 | 0.779    | -0.056                 | 0.605    |
| 2,3-dinor- F <sub>2</sub> -IsoPs            | -0.200                 | 0.079    | 0.062                  | 0.571    |
| 2,3-dinor-5,6-dihydro-F <sub>2</sub> -IsoPs | 0.174                  | 0.132    | -0.075                 | 0.491    |
| 8-OHdG                                      | 0.150                  | 0.264    | 0.147                  | 0.239    |
| Adjusted for creatinine (ng/mg)             |                        |          |                        |          |
| Total F <sub>2</sub> -IsoPs                 | -0.130                 | 0.273    | 0.141                  | 0.205    |
| 8-iso-F <sub>2</sub> -IsoPs                 | -0.130                 | 0.265    | -0.151                 | 0.167    |
| 2,3-dinor-F <sub>2</sub> -IsoPs             | -0.335                 | 0.004    | 0.102                  | 0.351    |
| 2,3-dinor-5,6-dihydro-F <sub>2</sub> -IsoPs | 0.077                  | 0.502    | 0.101                  | 0.351    |
| 8-OHdG                                      | -0.156                 | 0.243    | 0.135                  | 0.300    |

**Abbreviations:** F<sub>2</sub>-IsoPs= F<sub>2</sub>-isoprostanes, HETEs=hydroxyeicosatetraenoic acid, COPs=cholesterol oxidation products, GGT=gamma glutamyltransferase, hs-CRP=high-sensitivity C-reactive protein, PAF-AH=platelet activating factor-acetylhydrolase activities, PLA<sub>2</sub>=phospholipase A<sub>2</sub> activities, 8-OHdG= 8-hydroxydeoxyguanosine
